# Supplementary material for: Development of highly sensitive fluorescent sensor and fluorescent sensor-doped polymer films for trace amounts of water based on photo-induced electron transfer
Source: Royal Society of Chemistry journal article supplement (doi:10.1039/d1ma00881a), 2021-01-01
Supplement: d1ma00881a1.pdf [file d1ma00881a1.pdf]

## Supplementary Information

### **Development of highly sensitive fluorescent sensor and fluorescent sensor-doped polymer films for trace amounts of water based on photo-induced electron transfer**

Saori Miho,<sup>a</sup> Takuma Fumoto,<sup>a</sup> Yuta Mise,<sup>a</sup> Keiichi Imato,<sup>a</sup> Seiji Akiyama,<sup>b</sup> Mio Ishida<sup>b</sup> and Yousuke Ooyama<sup>\*a</sup>

*<sup>a</sup>Department of Applied Chemistry, Graduate School of Engineering, Hiroshima University, 1-4-1 Kagamiyama, Higashi-Hiroshima 739-8527, Japan. E-mail: yooyama@hiroshima-u.ac.jp; Fax: (+81) 82-424-5494*

*<sup>b</sup>Science & Innovation Center, Mitsubishi Chemical Corporation, 1000 Kamoshida-cho, Aoba-ku, Yokohama-shi, Kanagawa 227-8502, Japan*

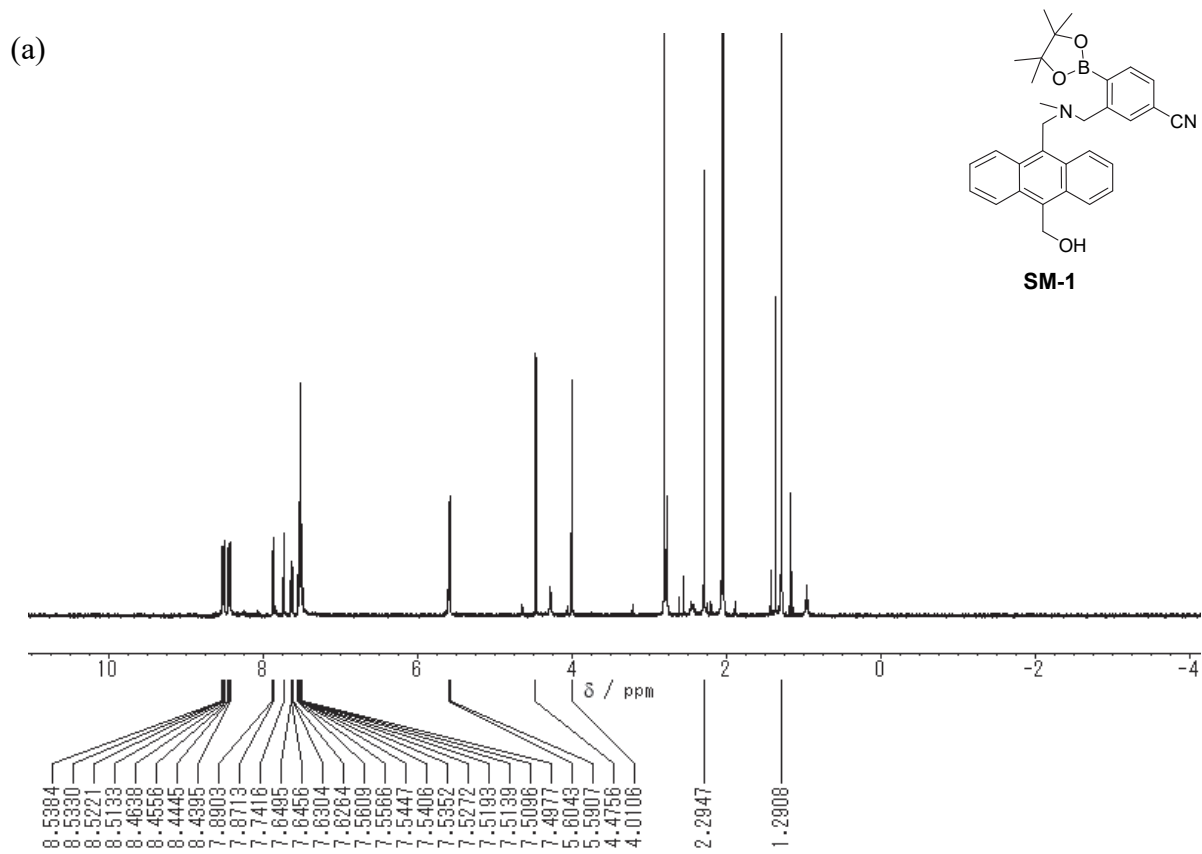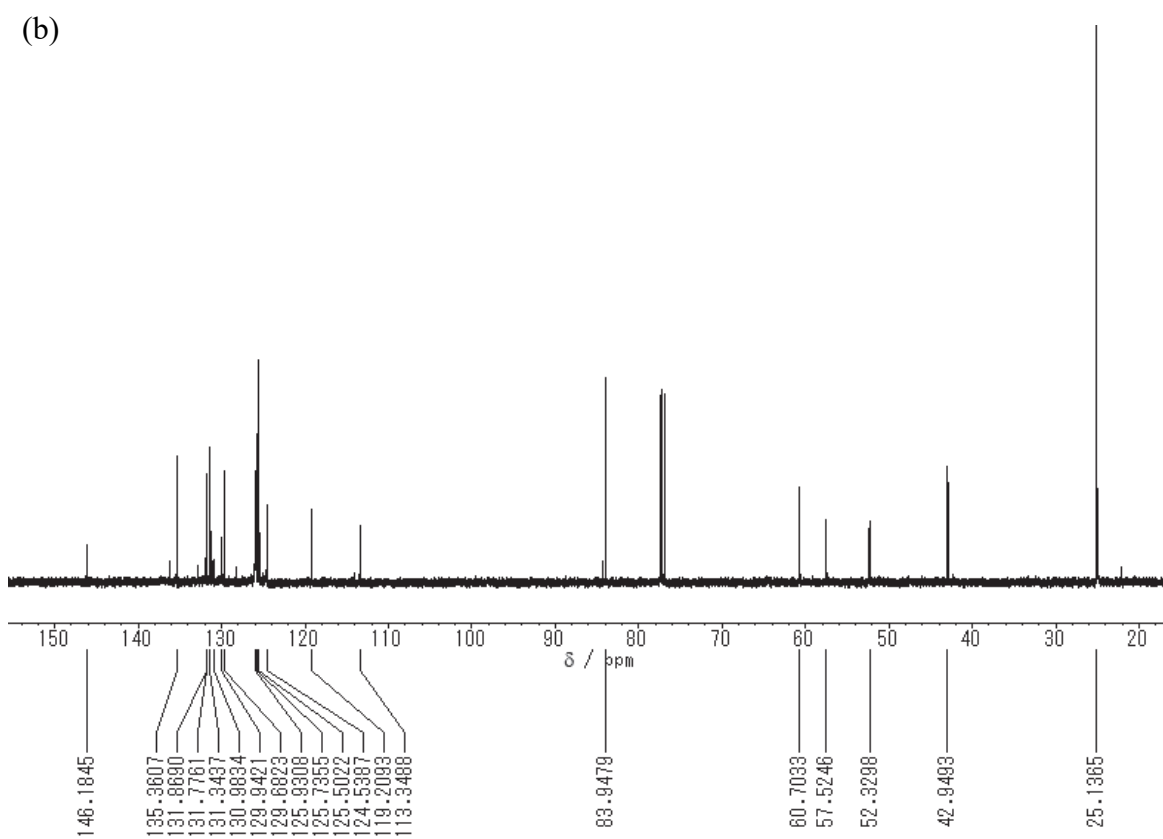

**Fig. S1** (a)  $^1\text{H}$  NMR (400 MHz) spectrum of **SM-1** in acetone- $d_6$ . (b)  $^{13}\text{C}$  NMR (125 MHz) spectrum of **SM-1** in  $\text{CDCl}_3$ .

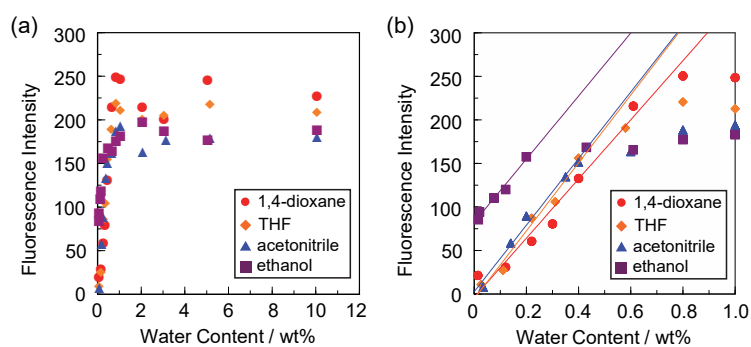

**Fig. S2** Fluorescence peak intensity at around 413 nm of **OF-2** ( $\lambda^{\text{ex}} = 366$  nm) as a function of water content below (a) 10 wt% and (b) 1.0 wt% in 1,4-dioxane, THF, acetonitrile, and ethanol.

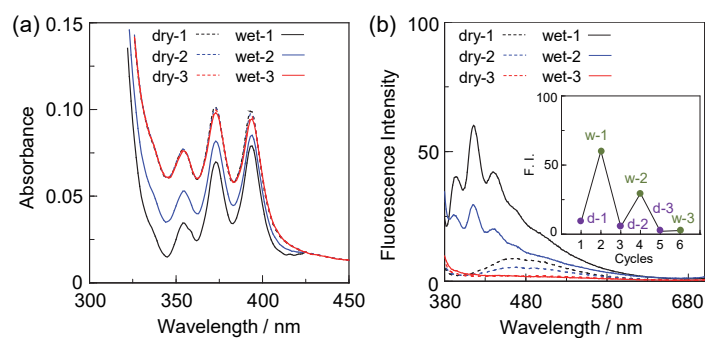

**Fig. S3** (a) Photoabsorption and (b) fluorescence spectra ( $\lambda^{\text{ex}} = 366$  nm) of spin-coated **OF-2** film before (in dry process) and after (in wet process) exposure to moisture. For photoabsorption spectra, baseline-correction has been made to be the same absorbance at 425 nm for all the spectra. Inset in (b) shows reversible switching of fluorescence intensity at around 470 nm in dry process and at 415 nm in wet process of spin-coated **OF-2** film.

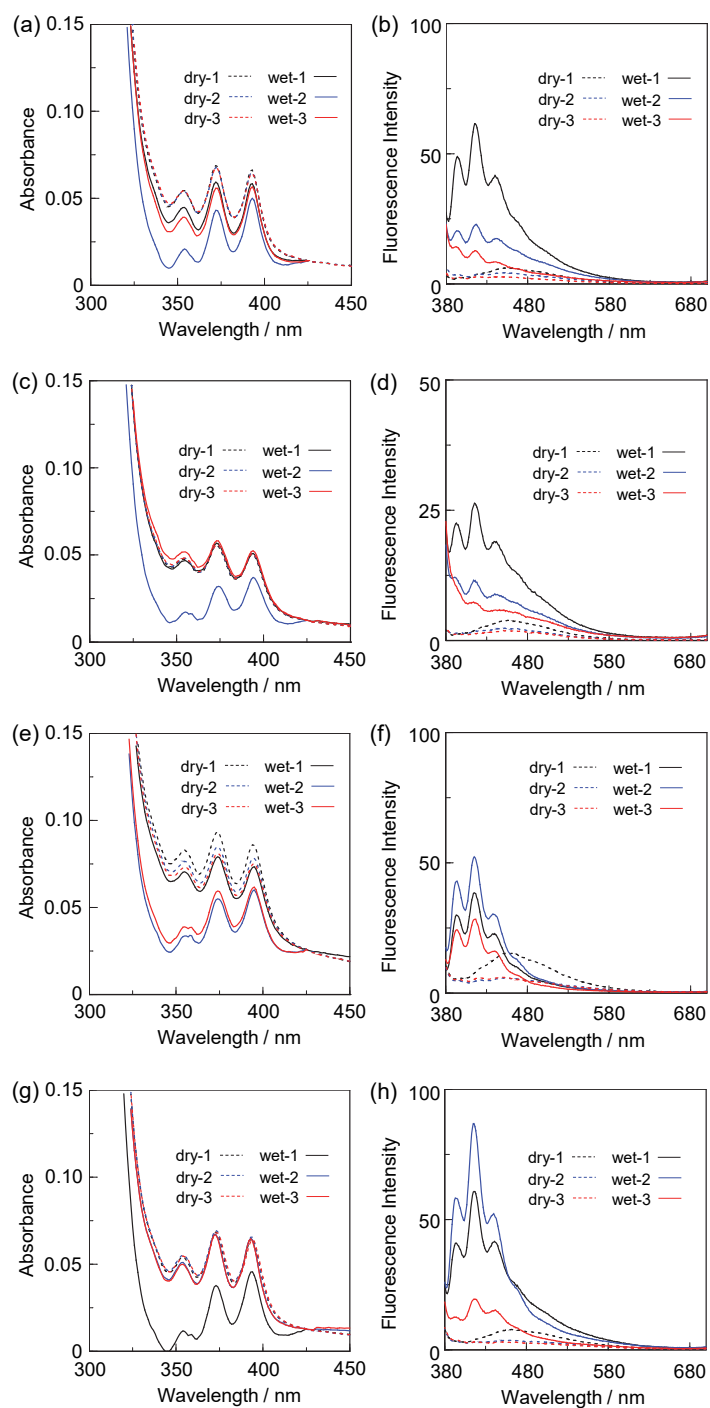

**Fig. S4** (a) Photoabsorption and (b) fluorescence spectra ( $\lambda^{\text{ex}} = 366$  nm) of spin-coated PS film with 50 wt% **OF-2** before (in dry process) and after (in wet process) exposure to moisture. (c) Photoabsorption and (d) fluorescence spectra ( $\lambda^{\text{ex}} = 366$  nm) of spin-coated PVP film with 50 wt% **OF-2** before (in dry process) and after (in wet process) exposure to moisture. (e) Photoabsorption and (f) fluorescence spectra ( $\lambda^{\text{ex}} = 366$  nm) of spin-coated PVA film with 50 wt% **OF-2** before (in dry process) and after (in wet process) exposure to moisture. (g) Photoabsorption and (h) fluorescence spectra ( $\lambda^{\text{ex}} = 366$  nm) of spin-coated PEG film with 50 wt% **OF-2** before (in dry process) and after (in wet process) exposure to moisture. For all the photoabsorption spectra, baseline-correction has been made to be the same absorbance at 425 nm.

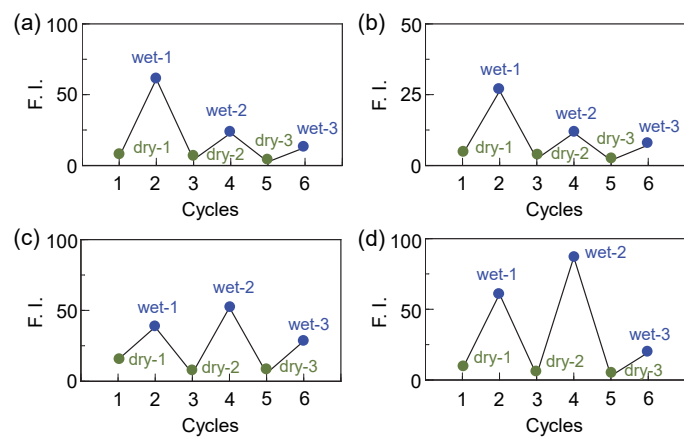

**Fig. S5** Reversible switching of fluorescence intensity at around 470 nm in dry process and at 415 nm in wet process of 50 wt% **OF-2**-doped (a) PS, (b) PVP, (c) PVA, and (d) PEG films.
